# Supplementary material for: Impact of Body Mass Index on All-Cause Mortality in Adults: A Systematic Review and Meta-Analysis
Source: MDPI journal article supplement (doi:10.3390/jcm13082305), 2024-04-16
Supplement: s1 [file s1]

| no | disease_cat        | study                     | cases | n      | disease                       | continent     | follow_up_years | adjustments                                                                                                          | Quality of study (NOS) |
|----|--------------------|---------------------------|-------|--------|-------------------------------|---------------|-----------------|----------------------------------------------------------------------------------------------------------------------|------------------------|
| 1  | General population | Baldinger et al. 2006     | 588   | 22927  | adult men with high insurance | Europe        | 8.2             | age, calendar year of observation                                                                                    | good                   |
| 2  | General population | Cohen et al. 2014         | 11386 | 239526 | African American adults       | North America | 11.7            | sex, education, marital status, alcohol consumption, and physical activity                                           | good                   |
| 3  | General population | Freedman et al. 2006 a    | 2278  | 64493  | adults                        | North America | 14.7            | smoking duration, alcohol consumption, race and education                                                            | good                   |
| 4  | General population | Freedman et al. 2006 b    | 1495  | 19011  | adults                        | North America | 14.7            | smoking duration, alcohol consumption, race and education                                                            | good                   |
| 5  | General population | Gelber et al. 2007        | 5438  | 99253  | adults                        | North America | 5.7             | baseline age (continuous, in years), alcohol consumption, physical activity                                          | good                   |
| 6  | General population | Hjartåker et al. 2005 a   | 652   | 98396  | adult premenopausal women     | Europe        | 9.1             | age, BMI                                                                                                             | good                   |
| 7  | General population | Hjartåker et al. 2005 b   | 535   | 4050   | adult postmenopausal women    | Europe        | 9.1             | age, BMI                                                                                                             | good                   |
| 8  | General population | Hu et al. 2022            | 683   | 12089  | adults                        | Asia          | 5.6             | age, sex, current smokers and drinkers, SBP and DBP.                                                                 | fair                   |
| 9  | General population | Katzmarzyk et al. 2012 a  | 707   | 5210   | adults                        | North America | 13.9            | age, sex, exam year, smoking status, alcohol consumption and education                                               | good                   |
| 10 | General population | Katzmarzyk et al. 2012 b  | 442   | 5312   | adults                        | North America | 13.9            | age, sex, exam year, smoking status, alcohol consumption and education                                               | good                   |
| 11 | General population | Kee et al. 2017           | 1035  | 32839  | adults                        | Asia          | 5               | age group, gender, ethnicity                                                                                         | good                   |
| 12 | General population | Klenk et al. 2009 a       | 8189  | 85000  | adults                        | Europe        | 15.1            | age, smoking                                                                                                         | good                   |
| 13 | General population | Klenk et al. 2009 b       | 7368  | 99698  | adults                        | Europe        | 15.1            | age, smoking                                                                                                         | good                   |
| 14 | General population | Lin et al. 2011 a         | 1549  | 65718  | adults                        | Asia          | 10              | age, smoking status, alcohol intake, betel-nut chewing, level of physical activity, income level and education level | good                   |
| 15 | General population | Lin et al. 2011 b         | 2398  | 58738  | adults                        | Asia          | 10              | age, smoking status, alcohol intake, betel-nut chewing, level of physical activity, income level and education level | good                   |
| 16 | General population | Manne-Goehler et al. 2021 | 779   | 9728   | rural population              | Africa        | 7               | adjusted for current age (as timescale), sex, HIV status and socioeconomic status.                                   | good                   |

|    |                    |                         |       |        |                                            |               |      |                                                                                                                                                                                                                                                                                                          |      |
|----|--------------------|-------------------------|-------|--------|--------------------------------------------|---------------|------|----------------------------------------------------------------------------------------------------------------------------------------------------------------------------------------------------------------------------------------------------------------------------------------------------------|------|
| 17 | General population | Nagai et al. 2010 a     | 3685  | 21038  | adults                                     | Asia          | 12   | age in 5-year categories; weight change since age 20 years; education; marital status; cigarette smoking; alcohol drinking; time spent walking per day; sports and physical exercise time per week, history of kidney disease; history of liver disease; history of hypertension and history of diabetes | good |
| 18 | General population | Nagai et al. 2010 b     | 2022  | 22934  | adults                                     | Asia          | 12   | age in 5-year categories; weight change since age 20 years; education; marital status; cigarette smoking; alcohol drinking; time spent walking per day; sports and physical exercise time per week, history of kidney disease; history of liver disease; history of hypertension and history of diabetes | good |
| 19 | General population | Shimazu et al. 2009 a   | 2617  | 38080  | adults                                     | Asia          | 7    | age, sex, smoking status, alcohol drinking, walking duration, education; green vegetables, total fruit and total energy intake, green tea intake                                                                                                                                                         | good |
| 20 | General population | Shimazu et al. 2009 b   | 2617  | 38080  | adults                                     | Asia          | 7    | age, sex, smoking status, alcohol drinking, walking duration, education; green vegetables, total fruit and total energy intake, green tea intake                                                                                                                                                         | good |
| 21 | General population | Song et al. 2007        | 11081 | 338320 | adult women                                | Asia          | 10   | Model 2: age, alcohol consumption, smoking, engagement in regular physical exercise, area of residence, height (cm), menopausal status, employment status                                                                                                                                                | good |
| 22 | General population | Thorogood et al. 2003   | 1134  | 10858  | meat eaters and non-meat eaters            | Europe        | 18   | age at recruitment, sex, smoking habits, reported pre-existing cardiovascular disease or diabetes                                                                                                                                                                                                        | good |
| 23 | Diabetes           | Zahir et al. 2019 a     | 73    | 150    | diabetes                                   | Australia     | 14.6 | sex, educational attainment, weekly income, smoking status, physical activity, cluster, and strata of age group and marital status                                                                                                                                                                       | good |
| 24 | General population | Zahir et al. 2019 b     | 1438  | 10394  | general                                    | Australia     | 14.6 | sex, educational attainment, weekly income, smoking status, physical activity, cluster, and strata of age group and marital status                                                                                                                                                                       | good |
| 25 | Elderly            | Atlantis et al. 2010    | 409   | 1000   | elderly                                    | Australia     | 12   | age, sex, smoking status, instrumental activities of daily living, timed "get-up and go", social activity, cognitive impairment, cardiovascular disease                                                                                                                                                  | good |
| 26 | Elderly            | Corrada et al. 2006     | 11203 | 13451  | elderly                                    | North America | 9.8  | age at entry, gender, and smoking                                                                                                                                                                                                                                                                        | good |
| 27 | Elderly            | Li et al. 2017          | 327   | 885    | older men with impaired glucose regulation | Asia          | 10   | age, smoking status, history of hypertension, systolic blood pressure, triglycerides, low-density lipoprotein cholesterol, fasting plasma glucose, 2h-PG, serum creatinine                                                                                                                               | good |
| 28 | Elderly            | Takata et al. 2007      | 49    | 675    | 80-year-old population                     | Asia          | 4    | sex, current outpatient status, smoking, drinking, weight loss, systolic blood pressure, physical activity, functional status, marital status, preexisting diseases, place of residence, and levels of total serum cholesterol and glucose                                                               | good |
| 29 | Elderly            | Tamakoshi et al. 2010 a | 588   | 11230  | older adults                               | Asia          | 11.2 | smoking, drinking, physical activity, sleep duration, stress, education, marital status, green vegetables, stroke, MI, cancer (includes unknown groups)                                                                                                                                                  | good |
| 30 | Elderly            | Tamakoshi et al. 2010 b | 3964  | 15517  | older adults                               | Asia          | 11.7 | smoking, drinking, physical activity, sleep duration, stress, education, marital status, green vegetables, stroke, MI, cancer (includes unknown groups)                                                                                                                                                  | good |
| 31 | Elderly            | Wang et al. 2017        | 926   | 2090   | elderly                                    | Asia          | 20   | age, sex, smoking and drinking status, pre-existing disease like hypertension, coronary heart disease, rheumatic heart disease and COPD                                                                                                                                                                  | good |
| 32 | Elderly            | Wang et al. 2018        | 5962  | 8026   | elderly over 80 years old                  | Asia          | 3.6  | age, gender, socio-demographic and lifestyle factors (smoking, alcohol drinking, physical activity, intake of fruit, vegetable, meat, fish and tea), residence (urban/rural) and education                                                                                                               | good |

|    |          |                      |       |        |                 |               |      |                                                                                                                                                                                                                                                                                                                                                                                                                                                                                                                                                                                                                                                                  |      |
|----|----------|----------------------|-------|--------|-----------------|---------------|------|------------------------------------------------------------------------------------------------------------------------------------------------------------------------------------------------------------------------------------------------------------------------------------------------------------------------------------------------------------------------------------------------------------------------------------------------------------------------------------------------------------------------------------------------------------------------------------------------------------------------------------------------------------------|------|
| 33 | Diabetes | Costanzo et al. 2015 | 3744  | 10568  | type 2 diabetes | Europe        | 10.6 | age, sex, duration of diabetes, smoking history, systolic blood pressure, COPD, cancer, CKD, and previous CVD                                                                                                                                                                                                                                                                                                                                                                                                                                                                                                                                                    | good |
| 34 | Diabetes | Edqvist et al. 2018  | 17546 | 149345 | type 2 diabetes | Europe        | 5.5  | age group, year of inclusion, sex, the interaction between duration of diabetes and age, income, education, marital status, immigrant status, coronary heart disease, acute myocardial infarction, stroke, atrial fibrillation, heart failure and chronic kidney disease                                                                                                                                                                                                                                                                                                                                                                                         | good |
| 35 | Diabetes | German et al. 2020   | 716   | 10251  | type 2 diabetes | North America | 3.7  | adjusted for age, gender, race (binary), arm of the trial, statin use, GFR, mean SBP, mean DBP, mean LDL, mean HD, mean HbA1C, years of diabetes, cigarette smoking status, antihypertensive medication use, baseline cardiovascular disease status.                                                                                                                                                                                                                                                                                                                                                                                                             | good |
| 36 | Diabetes | Hong et al. 2022     | 4215  | 53988  | type 2 diabetes | Asia          | 8.6  | Adjusted for sex (male, female), age (35–44, 45–54, 55–64, 65–74, 75+), income level (Medical Aid, deciles 1–2, deciles 3–4, deciles 5–6, deciles 7–8, deciles 9–10), residence (Seoul, metropolitan, city and county), smoking status (never smoker, former smoker, current smoker), alcohol intake (never, 2–3 times/month, 1–2 times/week, 3–4 times/week, every day), physical activity (no activity, 1–2 times/week, 3–4 times/week, 5–6 times/week, every day), family history of diabetes mellitus (yes, no), medication adherence (adherence, non-adherence), systolic blood pressure (continuous variable) and total cholesterol (continuous variable). | good |
| 37 | Diabetes | Huang et al. 2021    | 1162  | 6354   | type 2 diabetes | Asia          | 8    | NA                                                                                                                                                                                                                                                                                                                                                                                                                                                                                                                                                                                                                                                               |      |
| 38 | Diabetes | Lee et al. 2018      | 7360  | 48438  | type 2 diabetes | Asia          | 10.7 | sex, age, systolic blood pressure, fasting glucose, total cholesterol, drinking status, smoking status, physical exercise, household income, use of anti-hypertensive drugs, use of statin drugs, use of anti-platelet drugs, and use of glucose-lowering drugs (metformin, sulfonylurea, insulin, and other glucose-lowering drugs)                                                                                                                                                                                                                                                                                                                             | good |
| 39 | Diabetes | Lee et al. 2021      | 2847  | 44055  | type 2 diabetes | Asia          | 3.8  | adjusted for age, sex, smoking history, alcohol consumption, regular exercise, and monthly income, s fasting plasma glucose, diabetes duration ( $\geq 5$ years versus $< 5$ years), and diabetes type (type 1 versus type 2 diabetes).                                                                                                                                                                                                                                                                                                                                                                                                                          | good |
| 40 | Diabetes | Lin et al. 2019      | 685   | 8545   | type 2 diabetes | Asia          | 4.03 | age, gender, smoking, alcohol drinking, duration of diabetes, type of hypoglycaemic drug, hypertension drug treatment, hyperlipidaemia, DKA, HHNK, severe hypoglycaemia, stroke, myocardial infarction, peripheral neuropathy, intermittent claudication, neuropathy, nephropathy, triglyceride, high-density lipoprotein, low-density lipoprotein, fasting plasma glucose, HbA1C and hospitalization status one year prior to baseline                                                                                                                                                                                                                          | good |
| 41 | Diabetes | Liu et al. 2017      | 1254  | 11449  | type 2 diabetes | Asia          | 6.94 | age, sex, fasting blood glucose, smoking status, systolic blood pressure, history of hypertension, history of stroke, history of cancer, history of MI                                                                                                                                                                                                                                                                                                                                                                                                                                                                                                           | good |

|    |          |                         |      |       |                                                               |                                |      |                                                                                                                                                                                                                                                                                                                                                                                                                                                                                                             |      |
|----|----------|-------------------------|------|-------|---------------------------------------------------------------|--------------------------------|------|-------------------------------------------------------------------------------------------------------------------------------------------------------------------------------------------------------------------------------------------------------------------------------------------------------------------------------------------------------------------------------------------------------------------------------------------------------------------------------------------------------------|------|
| 42 | Diabetes | Ma et al. 2019          | 996  | 17259 | type 2 diabetes                                               | Asia                           | 7.33 | sex, age; duration of diabetes; smoking; micro- and macrovascular complications from diabetes, blood pressure, and albuminuria; LDL-C, HDL-C, triglycerides, HbA1c levels; treatment for hypertension or diabetes; and the use of antiplatelet drugs or statins                                                                                                                                                                                                                                             | good |
| 43 | Diabetes | Orsi et al. 2023        | 3602 | 15656 | type 2 diabetes                                               | Europe                         | 7.4  | for age and sex (Model 1), and age, smoking status, PA level, and comorbidities                                                                                                                                                                                                                                                                                                                                                                                                                             | good |
| 44 | Diabetes | Salehidoost et al. 2018 | 710  | 2383  | type 2 diabetes                                               | Asia                           | 7.8  | age, sex, systolic blood pressure, diastolic blood pressure, fasting plasma glucose, total cholesterol, triglyceride, smoking and diabetes duration                                                                                                                                                                                                                                                                                                                                                         | good |
| 45 | Diabetes | Vestberg et al. 2018    | 1261 | 17449 | type 1 diabetes                                               | Europe                         | 8.5  | sex, age, diabetes duration, HbA1c, blood pressure (both diastolic and systolic), smoking, microalbuminuria and macroalbuminuria, lipid-lowering agents, blood pressure medications and level of education                                                                                                                                                                                                                                                                                                  | good |
| 46 | CVD      | Aiumtrakul et al. 2022  | 253  | 5887  | high CV risk subjects                                         | Asia                           | 5    | NA                                                                                                                                                                                                                                                                                                                                                                                                                                                                                                          | fair |
| 47 | CVD      | Cai et al. 2014         | 33   | 247   | advanced heart failure with cardiac resynchronization therapy | Asia                           | 2.5  | age, gender, ischemic cardiomyopathy, diabetes mellitus, hypertension, hypercholesterolemia, pulmonary arterial hypertension (PAH), left bundle branch block (LBBB), LVEF, MR severity, serum blood urea nitrogen and creatinine, and baseline use of $\beta$ -blocker, angiotensin-converting enzyme inhibitor and angiotensin receptor blocker (ACEI/ARB) and statin                                                                                                                                      | good |
| 48 | CVD      | Curtis et al. 2005      | 2597 | 7767  | heart failure                                                 | North America                  | 3.08 | age; sex; LVEF; NYHA class; history of myocardial infarction; dyspnea; duration of HF symptoms; diabetes; hypertension; HF etiology; blood pressure; heart rate; rales; elevated jugular venous pressure; peripheral edema; presence of an S3 heart sound; radiologic evidence of pulmonary congestion; prior use of digoxin, potassium-sparing diuretics, all other diuretics, angiotensin-converting enzyme inhibitors, nitrates, and/or hydralazine; randomization to digoxin; and creatinine levels     | good |
| 49 | CVD      | Faggioni et al. 2018    | 440  | 9420  | PCI with drug-eluting stents                                  | multinational                  | 3    | age, diabetes, hypertension, smoking habit, hypercholesterolemia, family history of CAD, presentation (STEMI, NSTEMI, unstable angina, stable CAD), number of stents implanted, stent length, and B2/C lesions                                                                                                                                                                                                                                                                                              | good |
| 50 | CVD      | Feng et al. 2021        | 1195 | 8551  | coronary artery disease                                       | Asia                           | 7.5  | age, sex, hypertension, history of MI, acute MI, DM, current smoking, treatment strategy (MT, PCI, or CABG) and preoperative SYNTAX score                                                                                                                                                                                                                                                                                                                                                                   | good |
| 51 | CVD      | Haass et al. 2011       | 874  | 4109  | heart failure                                                 | North America, Australia, Asia | 4.1  | age, sex, New York Heart Association (NYHA) class, heart rate, systolic blood pressure, left ventricular hypertrophy, LVEF, cause of HF, hospitalization for HF within the last 6 months, history of hypertension, myocardial infarction, stroke, chronic obstructive pulmonary disease and/or diabetes, use of diuretics, digoxin, a calcium-channel blocker, lipid-lowering agents, an angiotensin-converting enzyme (ACE) inhibitor, or a $\beta$ -blocker, and N-terminal pro-brain natriuretic peptide | good |

|    |     |                          |      |       |                                               |               |      |                                                                                                                                                                                                                                                                                                                                                                                                                                               |      |
|----|-----|--------------------------|------|-------|-----------------------------------------------|---------------|------|-----------------------------------------------------------------------------------------------------------------------------------------------------------------------------------------------------------------------------------------------------------------------------------------------------------------------------------------------------------------------------------------------------------------------------------------------|------|
| 52 | CVD | Hamaguchi et al. 2010    | 431  | 2154  | heart failure                                 | Asia          | 2.1  | age, sex, cause of heart failure, medical history (diabetes mellitus, hyperuricemia, smoking), serum creatinine, hemoglobin concentration, NYHA functional class at discharge, BNP at discharge, and medication use                                                                                                                                                                                                                           | good |
| 53 | CVD | Hwang et al. 2022        | 1732 | 4146  | heart failure                                 | Asia          | 1.8  | age, sex, systolic blood pressure, presence of DM, hemoglobin and GFR levels, and natriuretic peptide level                                                                                                                                                                                                                                                                                                                                   | good |
| 54 | CVD | Inoue et al. 2016        | 159  | 6379  | non-valvular atrial fibrillation              | Asia          | 2    | BMI, age, sex, heart failure, hypertension, diabetes mellitus, stroke, coronary artery disease, antiplatelets, cardiomyopathy, permanent atrial fibrillation, statins, digitalis, Na-channel blockers                                                                                                                                                                                                                                         | good |
| 55 | CVD | Jong et al. 2019         | 74   | 1221  | diabetes mellitus and acute coronary syndrome | Asia          | 1.52 | BMI, age, sex, CKD, left ventricular ejection fraction <40%, left main disease, ACS subtype, percutaneous coronary intervention treatment, coronary artery bypass grafting treatment, hemoglobin A1c, discharge medications (including angiotensin-converting enzyme inhibitors/angiotensin II receptor blockers, beta blockers, dual-antiplatelet medications, or statins), and current cigarette smoking status                             | good |
| 56 | CVD | Kenchiah et al. 2007     | 1831 | 7599  | heart failure                                 | multinational | 3.14 | age, sex                                                                                                                                                                                                                                                                                                                                                                                                                                      | good |
| 57 | CVD | Masoudkabar et al. 2022  | 1838 | 17751 | midterm surgical revascularization            | Asia          | 5    | age, sex, diabetes mellitus, hypertension, hyperlipidemia, family history, current smoking, opium abuse, CKD, ejection fractions, left main involvements, numbers of diseased vessels, numbers of grafts, intensive care unit stay, off-pump surgery, myocardial infarction of less than 7 days, chronic obstructive pulmonary disease, cerebrovascular disease, previous percutaneous coronary interventions, discharge medications          | good |
| 58 | CVD | Moholdt et al. 2017      | 2372 | 2821  | coronary heart disease                        | Europe        | 12.5 | age, examination year, smoking status, diabetes mellitus, alcohol consumption, hypertension, health status, physical activity for body mass index and vice versa, and stratified by sex                                                                                                                                                                                                                                                       | good |
| 59 | CVD | Nezu et al. 2023         | 437  | 6927  | atrial fibrillation                           | Asia          | 3.9  | age, sex, smoking status, histories of hypertension, DM, heart failure, coronary heart diseases, chronic hepatic dysfunction, stroke, major bleeding, and malignancy, anemia (hemoglobin < 11 g/dl), renal dysfunction (estimated glomerular filtration rate < 30 ml/min/1.73 m <sup>2</sup> or hemodialysis), antiplatelets' use, and statin use                                                                                             | good |
| 60 | CVD | Olsen et al. 2008 a      | 2555 | 10449 | stroke                                        | Europe        | 1.5  | sex                                                                                                                                                                                                                                                                                                                                                                                                                                           | good |
| 61 | CVD | Olsen et al. 2008 b      | 2286 | 11435 | stroke                                        | Europe        | 1.5  | sex                                                                                                                                                                                                                                                                                                                                                                                                                                           | good |
| 62 | CVD | Shiga et al. 2018        | 450  | 6216  | myocardial infarction                         | Asia          | 3.6  | age, sex, risk factors, left ventricular ejection fraction, and medications                                                                                                                                                                                                                                                                                                                                                                   | good |
| 63 | CVD | Tokarek et al. 2019      | 24   | 147   | transcatheter aortic valve implantation       | Europe        | 1.26 | age, sex                                                                                                                                                                                                                                                                                                                                                                                                                                      | good |
| 64 | CVD | Vaduganathan et al. 2012 | 338  | 2640  | valvular heart surgery                        | North America | 2.98 | age, gender, diabetes, hypertension, hypercholesterolemia, congestive heart failure, history of atrial fibrillation, coronary artery disease, family history of coronary artery disease, creatinine levels, chronic obstructive pulmonary disease, peripheral vascular disease, cerebrovascular disease, Ambler score, previous percutaneous coronary intervention, previous valve replacement or repair, previous intrapericardial or vessel | good |

|    |        |                        |       |        |                                              |               |      |                                                                                                                                                                                                                                                                                                                                                                                                                  |      |
|----|--------|------------------------|-------|--------|----------------------------------------------|---------------|------|------------------------------------------------------------------------------------------------------------------------------------------------------------------------------------------------------------------------------------------------------------------------------------------------------------------------------------------------------------------------------------------------------------------|------|
|    |        |                        |       |        |                                              |               |      | procedure, repeat sternotomy, concomitant atrial fibrillation ablation surgery, concomitant coronary artery bypass grafting, isolated mitral valve surgery, isolated aortic valve surgery, tricuspid valve surgery, multivalve (aortic and mitral) surgery, left ventricular ejection fraction, elective status, New York Heart Association class III or IV, and perioperative medications                       |      |
| 65 | CVD    | Wang et al. 2015       | 159   | 1286   | atrial fibrillation                          | Asia          | 2.1  | congestive heart failure, hypertension, diabetes mellitus, prior stroke/TIA, peripheral vascular disease, previous TE other than stroke/TIA, age $\geq 75$ years, smoking, paroxysmal AF, renal dysfunction, anticoagulation therapy, and sex category                                                                                                                                                           | good |
| 66 | CVD    | Wang et al. 2017       | 131   | 10723  | patients after PCI                           | Asia          | 2    | age, gender, diabetes, hypertension, current smoking, PVD, dyslipidemia, CVD, previous PCI, previous CABG, current smoking, hemoglobin before PCI, Ccr<mL/min/1.73 m <sup>2</sup> , LVEF<40%, syntax score, chronic total occlusion lesion, B2 or C type lesion, left main involved, transfemoral, and TIMI 2 or 3 flow after PC                                                                                 | good |
| 67 | CVD    | Wang et al. 2019       | 862   | 10942  | atrial fibrillation                          | Asia          | 2.5  | age, heart failure, coronary artery disease, stroke/transient ischemic attack/peripheral thromboembolism, hypertension, diabetes mellitus, hyperlipidemia, history of bleeding, chronic kidney disease: eGFR<60 mL/min/1.73 m <sup>2</sup> , chronic obstructive pulmonary disease, the usage of warfarin, angiotensin-converting enzyme inhibitor/angiotensin receptor blocker, antiarrhythmic drugs and statin | good |
| 68 | CVD    | Won et al. 2023        | 82    | 5112   | PCI                                          | Asia          | 2    | NA                                                                                                                                                                                                                                                                                                                                                                                                               | fair |
| 69 | CVD    | Wu et al. 2009         | 143   | 446    | heart failure due to acute coronary syndrome | North America | 9.4  | age, male gender, diabetes, blocker prescribed at hospital discharge, angiotensin-converting enzyme inhibitor or angiotensin receptor blocker prescribed at discharge, initial creatinine, and hemoglobin                                                                                                                                                                                                        | good |
| 70 | CVD    | Xu et al. 2015         | 34354 | 388724 | hypertension                                 | Europe        | 8    | age, sex, pre existing medical conditions, smoking, alcohol use, and socioeconomic status, interaction terms between BMI category and preexisting cardiovascular diagnoses, COPD, smoking, and alcohol history. Hazard ratios represent hazards for patients who had no history of smoking, heavy alcohol use, cardiovascular disease, or COPD                                                                   | good |
| 71 | CVD    | Yang et al. 2016       | 622   | 20694  | hypertension                                 | Asia          | 4.5  | sex, age, center, baseline and on-treatment BP, smoking status, alcohol drinking, education, stress, fasting blood glucose, total cholesterol, triglycerides, serum creatinine, homocysteine, albumin                                                                                                                                                                                                            | good |
| 72 | CVD    | Zittermann et al. 2014 | 880   | 9133   | cardiac surgery                              | Europe        | 2    | age, sex, smoking status, left ventricular ejection fraction, eGFR, EuroSCORE, type of surgery, on-pump surgery, operative priority, concomitant diagnoses, biochemical parameters, medications                                                                                                                                                                                                                  | good |
| 73 | Cancer | Arem et al. 2013       | 299   | 1400   | endometrial cancer                           | North America | 10   | categorical variables tumor grade, tumor stage, surgery, chemotherapy, race, family history of breast cancer, diabetes, and smoking status                                                                                                                                                                                                                                                                       | good |
| 74 | Cancer | Arem et al. 2017       | 91    | 467    | endometrial cancer                           | North America | 10.2 | age at diagnosis, tumor stage, tumor grade, diabetes, age at menarche, self-reported health status                                                                                                                                                                                                                                                                                                               | good |
| 75 | Cancer | Baade et al. 2011      | 458   | 1779   | colorectal cancer                            | Australia     | 4.9  | age, stage, smoking status, site, treatment, sex, lifestyle and clinical variables, physical activity                                                                                                                                                                                                                                                                                                            | good |

|    |        |                        |      |        |                                           |               |      |                                                                                                                                                                                                                                                                                                                                                |      |
|----|--------|------------------------|------|--------|-------------------------------------------|---------------|------|------------------------------------------------------------------------------------------------------------------------------------------------------------------------------------------------------------------------------------------------------------------------------------------------------------------------------------------------|------|
| 76 | Cancer | Doria-Rose et al. 2006 | 271  | 633    | colorectal cancer in postmenopausal women | North America | 9.4  | stratified on age and stage of the disease, and adjusted for postmenopausal hormone use and smoking                                                                                                                                                                                                                                            | good |
| 77 | Cancer | Kamineni et al. 2012   | 97   | 464    | early-stage breast cancer                 | North America | 10   | age, stage, and tamoxifen use                                                                                                                                                                                                                                                                                                                  | good |
| 78 | Cancer | Kawai et al. 2016      | 1418 | 20090  | breast cancer                             | Asia          | 6.7  | age, living place, detection method, family history of breast cancer, tumor stage, radiation therapy, chemotherapy, endocrine therapy, tumor subtypes, menopausal status, and registered year                                                                                                                                                  | good |
| 79 | Cancer | Lee et al. 2018        | 1279 | 7765   | gastric cancer                            | Asia          | 6.92 | age, sex, TNM stage, smoking, family history of gastric cancer, operation, histology, location, and ASA score                                                                                                                                                                                                                                  | good |
| 80 | Cancer | Du Y et al. 2023       | 1018 | 1888   | nasopharyngeal carcinoma                  | Asia          | 5.1  | age, sex, smoking and alcohol history, cancer stage, and treatment information                                                                                                                                                                                                                                                                 | good |
| 81 | Cancer | Reichle et al. 2015    | 4571 | 8673   | cancer                                    | Europe        | 11.9 | age at cancer diagnosis (in years), smoking status, and sex and statistically controlled according to tumor stage and cancer entity (                                                                                                                                                                                                          | good |
| 82 | Cancer | Troeschel et al. 2020  | 3855 | 8330   | prostate cancer                           | North America | 7.3  | age, treatment, tumor extent, Gleason score, postdiagnosis physical activity, education, diagnosis year                                                                                                                                                                                                                                        | good |
| 83 | Cancer | Zhou et al. 2014       | 346  | 600    | ovarian cancer                            | North America | 10.9 | age at baseline, time from study enrollment to ovarian cancer diagnosis, cancer disease stage, histology, hormone therapy use status, smoking status, physical activity, history of diabetes and status in the calcium and vitamin D trial, dietary modification trial, hormone therapy trials, and/or observational study                     | good |
| 84 | Other  | Agarwal et al. 2011    | 119  | 368    | hemodialysis patients                     | North America | 2.7  | sex, smoking, urea reduction ratio, aspirin use, diabetes mellitus, and serum albumin, number of antihypertensive medications, inferior vena cava diameter in expiration                                                                                                                                                                       | good |
| 85 | Other  | Ahmed et al. 2022      | 569  | 4834   | NAFLD                                     | North America | 20   | sex, diabetes, HTN, and dyslipidemia                                                                                                                                                                                                                                                                                                           | good |
| 86 | Other  | Allen et al. 2010      | 4959 | 11384  | after lung transplantation                | North America | 3.1  | BMI strata, age 60, gender, donor-recipient gender mismatch, transplant year, creatinine, history of diabetes, diagnosis of idiopathic pulmonary fibrosis, diagnosis of cystic fibrosis, intensive care unit care before LTx, hospitalization before LTx, bilateral LTx, ischemic time, private insurance/self-pay, and 6-minute walk distance | good |
| 87 | Other  | Chen et al. 2023       | 856  | 11900  | schizophrenia                             | Europe        | 2.6  | age, gender, marital status, ethnicity, employment status, IMD score, smoking status, HoNOS problems, received antipsychotic, antidepressant, manic, antihypertensives, lipid-lowering and antidiabetic medications, and comorbidities of diabetes, hypertension and hyperlipidaemia.                                                          | good |
| 88 | Other  | Dowsey et al. 2018 a   | 3698 | 55680  | total hip arthroplasty                    | North America | 4    | age, gender, race, year of operation, gender, diabetes, primary diagnoses, and ASA category, bilateral surgery, diabetes                                                                                                                                                                                                                       | good |
| 89 | Other  | Dowsey et al. 2018 b   | 6707 | 106874 | total knee arthroplasty                   | North America | 4    | age, gender, race, year of operation, gender, diabetes, primary diagnoses, and ASA category, bilateral surgery, diabetes                                                                                                                                                                                                                       | good |
| 90 | Other  | Dowsey et al. 2018 c   | 328  | 2950   | total hip arthroplasty                    | Australia     | 5    | age, Australian-born, year of operation, gender, diabetes, primary diagnoses, and ASA category, indication for surgery, diabetes                                                                                                                                                                                                               | good |

|    |       |                               |      |       |                              |               |      |                                                                                                                                                                                                                            |      |
|----|-------|-------------------------------|------|-------|------------------------------|---------------|------|----------------------------------------------------------------------------------------------------------------------------------------------------------------------------------------------------------------------------|------|
| 91 | Other | Dowsey et al. 2018 d          | 395  | 3435  | total knee arthroplasty      | Australia     | 5    | age, Australian-born, year of operation, gender, diabetes, primary diagnoses, and ASA category, indication for surgery, diabetes                                                                                           | good |
| 92 | Other | Izumida et al. 2019           | 1101 | 4498  | metabolically unhealthy      | Asia          | 18.4 | sex, age, total cholesterol, smoking status (never, ex-, or current smoker), drinking status, education attainment (<18 years or ≥18 years), married status (yes or no), physical activity index (PAI), and sleeping hours | good |
| 93 | Other | Kim et al. 2020               | 4975 | 18699 | hemodialysis patients        | Asia          | 4    | age, sex, smoking, alcohol drinking, regular exercise, low income, previous history of diabetes, hypertension, dyslipidemia, cardiovascular disease, cancer, and BMI or WC                                                 | good |
| 94 | Other | Lee et al. 2023               | 212  | 238   | pulmonary fibrosis           | North America | 2    | NA                                                                                                                                                                                                                         | good |
| 95 | Other | Prieto-Alhambra et al. 2014 a | 830  | 4647  | hip fracture                 | Europe        | 1.2  | age, gender, smoking, alcohol intake, oral glucocorticoid use, and Charlson comorbidity index.                                                                                                                             | good |
| 96 | Other | Prieto-Alhambra et al. 2014 b | 170  | 2847  | proximal humerus fracture    | Europe        | 1.3  | age, gender, smoking, alcohol intake, oral glucocorticoid use, and Charlson comorbidity index.                                                                                                                             | good |
| 97 | Other | Prieto-Alhambra et al. 2014 c | 823  | 21765 | osteoporotic nonhip fracture | Europe        | 1.4  | age, gender, smoking, alcohol intake, oral glucocorticoid use, and Charlson comorbidity index.                                                                                                                             | good |



The list of included studies.

1. Baldinger B, Schwarz C, Jaggy C. Cardiovascular risk factors, BMI and mortality in a cohort of Swiss males (1976-2001) with high-sum-assured life insurance cover. *J Insur Med.* 2006; 38: 44-53.
2. Cohen SS, Park Y, Signorello LB, et al. A pooled analysis of body mass index and mortality among African Americans. *PLoS One.* 2014; 9: 111980.
3. Freedman DM, Ron E, Ballard-Barbash R, et al. Body mass index and all-cause mortality in a nationwide US cohort. *Int J Obes (Lond).* 2006; 30: 822-829.
4. Gelber RP, Kurth T, Manson JE, et al. Body mass index and mortality in men: evaluating the shape of the association. *Int J Obes (Lond).* 2007; 31:1240-1247.
5. Hjartåker A, Adami HO, Lund E, Weiderpass E. Body mass index and mortality in a prospectively studied cohort of Scandinavian women: the women's lifestyle and health cohort study. *Eur J Epidemiol.* 2005; 20: 747-754.
6. Hu F, Cheng J, Yu Y, et al. Association Between Body Mass Index and All-Cause Mortality in a Prospective Cohort of Southern Chinese Adults Without Morbid Obesity. *Front Physiol.* 2022; 13: 857787.
7. Katzmarzyk PT, Reeder BA, Elliott S, et al. Body mass index and risk of cardiovascular disease, cancer and all-cause mortality. *Can J Public Health.* 2012; 103: 147-151.
8. Kee CC, Sumarni MG, Lim KH, et al. Association of BMI with risk of CVD mortality and all-cause mortality. *Public Health Nutr.* 2017; 20: 1226-1234.
9. Klenk J, Nagel G, Ulmer H, et al. Body mass index and mortality: results of a cohort of 184,697 adults in Austria. *Eur J Epidemiol.* 2009; 24: 83-91.

10. Lin WY, Tsai SL, Albu JB, et al. Body mass index and all-cause mortality in a large Chinese cohort. *CMAJ*. 2011; 183: 329-336
11. Manne-Goehler J, Baisley K, Vandormael A, et al. BMI and All-Cause Mortality in a Population-Based Cohort in Rural South Africa. *Obesity (Silver Spring)*. 2020; 28: 2414-2423.
12. Nagai M, Kuriyama S, Kakizaki M, et al. Effect of age on the association between body mass index and all-cause mortality: the Ohsaki cohort study. *J Epidemiol*. 2010; 20: 398-407.
13. Shimazu T, Kuriyama S, Ohmori-Matsuda K, et al. Increase in body mass index category since age 20 years and all-cause mortality: a prospective cohort study (the Ohsaki Study). *Int J Obes (Lond)*. 2009; 33: 490-496.
14. Song YM, Ha M, Sung J. Body mass index and mortality in middle-aged Korean women. *Ann Epidemiol*. 2007; 17: 556-563.
15. Thorogood M, Appleby PN, Key TJ, Mann J. Relation between body mass index and mortality in an unusually slim cohort. *J Epidemiol Community Health*. 2003; 57: 130-133.
16. Zahir SF, Griffin A, Veerman JL, et al. Exploring the association between BMI and mortality in Australian women and men with and without diabetes: the AusDiab study. *Diabetologia*. 2019; 62: 754-758.
17. Atlantis E, Browning C, Kendig H. Body mass index and unintentional weight change associated with all-cause mortality in older Australians: the Melbourne Longitudinal Studies on Healthy Ageing (MELSHA). *Age Ageing*. 2010; 39: 643-646.
18. Corrada MM, Kawas CH, Mozaffar F, Paganini-Hill A. Association of body mass index and weight change with all-cause mortality in the elderly. *Am J Epidemiol*. 2006; 163: 938-949.
19. Li ZB, Wang ML, Dong SY, Sun BR, et al. Effects of body mass index and weight change on mortality in older men with impaired glucose regulation. *Exp Gerontol*. 2017; 89: 87-92.

20. Takata Y, Ansai T, Soh I, et al. Association between body mass index and mortality in an 80-year-old population. *J Am Geriatr Soc.* 2007; 55: 913-917.
21. Tamakoshi A, Yatsuya H, Lin Y, et al. BMI and all-cause mortality among Japanese older adults: findings from the Japan collaborative cohort study. *Obesity (Silver Spring).* 2010; 18: 362-369.
22. Wang YF, Tang Z, Guo J, Tao LX, Liu L, Li HB, Li DT, Guo XH, Yang XH. BMI and BMI Changes to All-cause Mortality among the Elderly in Beijing: a 20-year Cohort Study. *Biomed Environ Sci.* 2017; 30: 79-87.
23. Wang J, Taylor AW, Zhang T, et al. Association between Body Mass Index and All-Cause Mortality among Oldest Old Chinese. *J Nutr Health Aging.* 2018; 22: 262-268.
24. Costanzo P, Cleland JG, Pellicori P, et al. The obesity paradox in type 2 diabetes mellitus: relationship of body mass index to prognosis: a cohort study. *Ann Intern Med.* 2015; 162: 610-618.
25. Edqvist J, Rawshani A, Adiels M, et al. BMI and Mortality in Patients With New-Onset Type 2 Diabetes: A Comparison With Age- and Sex-Matched Control Subjects From the General Population. *Diabetes Care.* 2018; 41: 485-493.
26. German CA, Laughey B, Bertoni AG, Yeboah J. Associations between BMI, waist circumference, central obesity and outcomes in type II diabetes mellitus: The ACCORD Trial. *J Diabetes Complications.* 2020; 34: 107499.
27. Hong JS, Kang HC. Body mass index and all-cause mortality in patients with newly diagnosed type 2 diabetes mellitus in South Korea: a retrospective cohort study. *BMJ Open.* 2022; 12: 048784.
28. Huang HL, Kung CY, Wang SM, et al. Effects of Body Mass Index and Pay-for-Performance Program on Risk of Death in Patients with Type 2 Diabetes: A Nationwide Cohort Study. *Int J Environ Res Public Health.* 2021; 18: 4648.

29. Lee DH, Ha KH, Kim HC, Kim DJ. Association of Body Mass Index with Risk of Major Adverse Cardiovascular Events and Mortality in People with Diabetes. *J Obes Metab Syndr*. 2018; 27: 61-70.
30. Lee YB, Kim B, Park J, et al. Early mortality and cardiovascular disease, varied association with body mass index and its changes in insulin-treated diabetes: a nationwide study. *Int J Obes (Lond)*. 2021; 45: 2482-2489.
31. Lin CC, Li CI, Liu CS, et al. Obesity paradox in associations between body mass index and diabetes-related hospitalization and mortality in patients with type 2 diabetes: Retrospective cohort studies. *Diabetes Metab*. 2019; 45: 564-572.
32. Liu H, Wu S, Li Y, et al. Body mass index and mortality in patients with type 2 diabetes mellitus: A prospective cohort study of 11,449 participants. *J Diabetes Complications*. 2017; 31: 328-333.
33. Ma J, Wang X, Zheng M, et al. A Multicenter Large-Scale Retrospective Analysis of the Correlation between Body Mass Index and All-Cause Mortality in Patients with Type 2 diabetes Mellitus: A Seven-Year Real-World Study. *Endocr Res*. 2019; 44: 103-109.
34. Orsi E, Solini A, Penno G, et al. Renal Insufficiency And Cardiovascular Events (RIACE) Study Group. Body mass index versus surrogate measures of central adiposity as independent predictors of mortality in type 2 diabetes. *Cardiovasc Diabetol*. 2022; 21: 266.
35. Salehidoost R, Mansouri A, Amini M, et al. Body mass index and the all-cause mortality rate in patients with type 2 diabetes mellitus. *Acta Diabetol*. 2018; 55: 569-577.
36. Vestberg D, Rosengren A, Eeg-Olofsson K, et al. Body mass index as a risk factor for coronary events and mortality in patients with type 1 diabetes. *Open Heart*. 2018; 5: 000727.
37. Aiumtrakul N, Kittithaworn A, Supasyndh O, et al. Association of body mass index with kidney function and mortality in high cardiovascular risk population: A nationwide prospective cohort study. *Nephrology (Carlton)*. 2022; 27: 25-34.

38. Cai C, Hua W, Ding LG, et al. Association of body mass index with cardiac reverse remodeling and long-term outcome in advanced heart failure patients with cardiac resynchronization therapy. *Circ J*. 2014; 78: 2899-2907.
39. Curtis JP, Selter JG, Wang Y, et al. The obesity paradox: body mass index and outcomes in patients with heart failure. *Arch Intern Med*. 2005; 165: 55-61.
40. Faggioni M, Baber U, Afshar AE, et al. Effects of Body Mass Index on Clinical Outcomes in Female Patients Undergoing Percutaneous Coronary Intervention With Drug-Eluting Stents: Results From a Patient-Level Pooled Analysis of Randomized Controlled Trials. *JACC Cardiovasc Interv*. 2018; 11: 68-76.
41. Feng X, Zhang C, Jiang L, et al. Body mass index and mortality in patients with severe coronary artery diseases: A cohort study from China. *Nutr Metab Cardiovasc Dis*. 2021; 31: 448-454.
42. Haass M, Kitzman DW, Anand IS, Miller A, Zile MR, Massie BM, Carson PE. Body mass index and adverse cardiovascular outcomes in heart failure patients with preserved ejection fraction: results from the Irbesartan in Heart Failure with Preserved Ejection Fraction (I-PRESERVE) trial. *Circ Heart Fail*. 2011; 4: 324-31.
43. Hamaguchi S, Tsuchihashi-Makaya M, Kinugawa S, et al. Body mass index is an independent predictor of long-term outcomes in patients hospitalized with heart failure in Japan. *Circ J* 2010; 74: 2605-2611.
44. Hwang IC, Choi HM, Yoon YE, et al. Body Mass Index, Muscle Mass, and All-Cause Mortality in Patients With Acute Heart Failure: The Obesity Paradox Revisited. *Int J Heart Fail*. 2022; 4: 95-109.
45. Inoue H, Kodani E, Atarashi H, et al. Impact of Body Mass Index on the Prognosis of Japanese Patients With Non-Valvular Atrial Fibrillation. *Am J Cardiol*. 2016; 118: 215-221.

46. Jong CB, Li HY, Pan SL, et al. Relationship Between Body Mass Index, Antidiabetic Agents, and Midterm Mortality in Patients With Both Type 2 Diabetes Mellitus and Acute Coronary Syndrome. *J Am Heart Assoc.* 2019; 8: 011215
47. Kenchiah S, Pocock SJ, Wang D, et al. Body mass index and prognosis in patients with chronic heart failure: insights from the Candesartan in Heart failure: Assessment of Reduction in Mortality and morbidity (CHARM) program. *Circulation.* 2007; 116: 627-636.
48. Masoudkabar F, Yavari N, Jameie M, et al. The association between different body mass index levels and midterm surgical revascularization outcomes. *PLoS One.* 2022; 17: 0274129.
49. Moholdt T, Lavie CJ, Nauman J. Interaction of Physical Activity and Body Mass Index on Mortality in Coronary Heart Disease: Data from the Nord-Trøndelag Health Study. *Am J Med.* 2017; 130: 949-957.
50. Nezu M, Ueda S, Uchida K, et al. Association between body mass index and long-term clinical outcomes in patients with non-valvular atrial fibrillation taking oral anticoagulants. *Heart Vessels.* 2023; 38: 551-561.
51. Olsen TS, Dehlendorff C, Petersen HG, Andersen KK. Body mass index and poststroke mortality. *Neuroepidemiology.* 2008; 30: 93-100.
52. Shiga T, Kohro T, Yamasaki H, et al. Body Mass Index and Sudden Cardiac Death in Japanese Patients After Acute Myocardial Infarction: Data From the JCAD Study and HIJAMI-II Registry. *J Am Heart Assoc.* 2018; 7: 008633.
53. Tokarek TA, Dziewierz A, Sorysz D, et al. The obesity paradox in patients undergoing transcatheter aortic valve implantation: is there any effect of body mass index on survival? *Kardiol Pol.* 2019; 77: 190-197.
54. Vaduganathan M, Lee R, Beckham AJ, et al. Relation of body mass index to late survival after valvular heart surgery. *Am J Cardiol.* 2012; 110: 1667-1678.

55. Wang HJ, Si QJ, Shan ZL, et al. Effects of body mass index on risks for ischemic stroke, thromboembolism, and mortality in Chinese atrial fibrillation patients: a single-center experience. *PLoS One*. 2015; 10: 0123516.
56. Wang H, Gao Z, Zhao X, et al. Association of body mass index with mortality in Chinese patients after percutaneous coronary intervention: A large single-center data. *Cardiovasc Ther*. 2017; 35.
57. Wang L, Du X, Dong JZ, et al. Body mass index and all-cause mortality in patients with atrial fibrillation: insights from the China atrial fibrillation registry study. *Clin Res Cardiol*. 2019; 108: 1371-1380.
58. Won KB, Shin ES, Kang J, et al. Body Mass Index and Major Adverse Events During Chronic Antiplatelet Monotherapy After Percutaneous Coronary Intervention With Drug-Eluting Stents - Results From the HOST-EXAM Trial. *Circ J*. 2023; 87: 268-276.
59. Wu AH, Eagle KA, Montgomery DG, et al. Relation of body mass index to mortality after development of heart failure due to acute coronary syndrome. *Am J Cardiol*. 2009; 103: 1736-1740.
60. Xu W, Shubina M, Goldberg SI, Turchin A. Body mass index and all-cause mortality in patients with hypertension. *Obesity (Silver Spring)*. 2015; 23: 1712-1720.
61. Yang W, Li JP, Zhang Y, et al. Association between Body Mass Index and All-Cause Mortality in Hypertensive Adults: Results from the China Stroke Primary Prevention Trial (CSPPT). *Nutrients*. 2016; 8: 384.
62. Zittermann A, Becker T, Gummert JF, Börgermann J. Body mass index, cardiac surgery and clinical outcome. A single-center experience with 9125 patients. *Nutr Metab Cardiovasc Dis*. 2014; 24: 168-175.
63. Arem H, Park Y, Pelsner C, et al. Prediagnosis body mass index, physical activity, and mortality in endometrial cancer patients. *J Natl Cancer Inst*. 2013; 105: 342-349.

64. Arem H, Chlebowski R, Stefanick ML, et al. Body mass index, physical activity, and survival after endometrial cancer diagnosis: results from the Women's Health Initiative. *Gynecol Oncol.* 2013; 128: 181-186.
65. Baade PD, Meng X, Youl PH, et al. The impact of body mass index and physical activity on mortality among patients with colorectal cancer in Queensland, Australia. *Cancer Epidemiol Biomarkers Prev.* 2011; 20: 1410-1420.
66. Doria-Rose VP, Newcomb PA, Morimoto LM, et al. Body mass index and the risk of death following the diagnosis of colorectal cancer in postmenopausal women (United States). *Cancer Causes Control.* 2006; 17: 63-70.
67. Kamineni A, Anderson ML, White E, et al. Body mass index, tumor characteristics, and prognosis following diagnosis of early-stage breast cancer in a mammographically screened population. *Cancer Causes Control.* 2013; 24: 305-312.
68. Kawai M, Tomotaki A, Miyata H, et al. Body mass index and survival after diagnosis of invasive breast cancer: a study based on the Japanese National Clinical Database-Breast Cancer Registry. *Cancer Med.* 2016; 5: 1328-1340.
69. Lee JH, Park B, Joo J, et al. Body mass index and mortality in patients with gastric cancer: a large cohort study. *Gastric Cancer.* 2018; 21: 913-924.
70. Reichle K, Peter RS, Concin H, Nagel G. Associations of pre-diagnostic body mass index with overall and cancer-specific mortality in a large Austrian cohort. *Cancer Causes Control.* 2015; 26: 1643-1652.
71. Troeschel AN, Hartman TJ, Jacobs EJ, et al. Postdiagnosis Body Mass Index, Weight Change, and Mortality From Prostate Cancer, Cardiovascular Disease, and All Causes Among Survivors of Nonmetastatic Prostate Cancer. *J Clin Oncol.* 2020; 38: 2018-2027.
72. Zhou Y, Chlebowski R, LaMonte MJ, et al. Body mass index, physical activity, and mortality in women diagnosed with ovarian cancer: results from the Women's Health Initiative. *Gynecol Oncol.* 2014; 133: 4-10.
73. Agarwal R. Body mass index-mortality paradox in hemodialysis: can it be explained by blood pressure? *Hypertension.* 2011; 58: 1014-1020.



74. Ahmed OT, Gidener T, Mara KC, et al. Natural History of Nonalcoholic Fatty Liver Disease With Normal Body Mass Index: A Population-Based Study. *Clin Gastroenterol Hepatol*. 2022; 20: 1374-1381.
75. Allen JG, Arnaoutakis GJ, Weiss ES, Merlo CA, Conte JV, Shah AS. The impact of recipient body mass index on survival after lung transplantation. *J Heart Lung Transplant*. 2010; 9: 1026-1033.
76. Chen J, Perera G, Shetty H, et al. Body mass index and mortality in patients with schizophrenia spectrum disorders: a cohort study in a South London catchment area. *Gen Psychiatr*. 2022; 35: 100819.
77. Dowsey MM, Choong PFM, Paxton EW, et al. Body Mass Index Is Associated With All-cause Mortality After THA and TKA. *Clin Orthop Relat Res*. 2018; 476: 1139-1148.
78. Izumida T, Nakamura Y, Ishikawa S. Impact of body mass index and metabolically unhealthy status on mortality in the Japanese general population: The JMS cohort study. *PLoS One*. 2019; 14: 0224802.
79. Kim CS, Han KD, Choi HS, et al. Association of Body Mass Index and Waist Circumference with All-Cause Mortality in Hemodialysis Patients. *J Clin Med*. 2020; 9: 1289.
80. Lee JS, Martin-Schwarze A, Freiheit E, et al. Real-World Clinical Outcomes Based on Body Mass Index and Annualized Weight Change in Patients with Idiopathic Pulmonary Fibrosis. *Adv Ther*. 2023; 40: 691-704.
81. Prieto-Alhambra D, Premaor MO, Avilés FF, et al. Relationship between mortality and BMI after fracture: a population-based study of men and women aged  $\geq 40$  years. *J Bone Miner Res*. 2014; 29: 1737-1744.
82. Du Y, Feng R, Chang ET, et al. Body mass index and body shape before treatment and nasopharyngeal carcinoma prognosis: A population-based patient cohort study in southern China. *Int J Cancer*. 2023; 153: 290-301.
